# Supplementary material for: Graphene surface induced specific self-assembly of poly(3-hexylthiophene) for nanohybrid optoelectronics: from first-principles calculation to experimental characterizations
Source: Royal Society of Chemistry journal article supplement (doi:10.1039/c3sm27767d), 2013-01-01
Supplement: c3sm27767d.pdf [file c3sm27767d.pdf]

## Supporting Information

### Graphene Surface Induced Specific Self-Assembly of Poly (3-hexylthiophene) for Nanohybrid Optoelectronics: From First-principles Calculation to Experimental Characterizations

*Do Hwan Kim<sup>†</sup>, Hyo Sug Lee<sup>†</sup>, Hyeon-Jin Shin<sup>†</sup>, Yoon-Su Bae<sup>§</sup>, Kang-Hyuck Lee<sup>||</sup>,*

*Sang-Woo Kim<sup>||</sup>, Dukhyun Choi<sup>§,\*</sup>, and Jae-Young Choi<sup>†,\*</sup>*

\*E-mail address: *dchoi@khu.ac.kr (D.C.), jaeyoung88.choi@samsung.com (J.-Y.C.)*

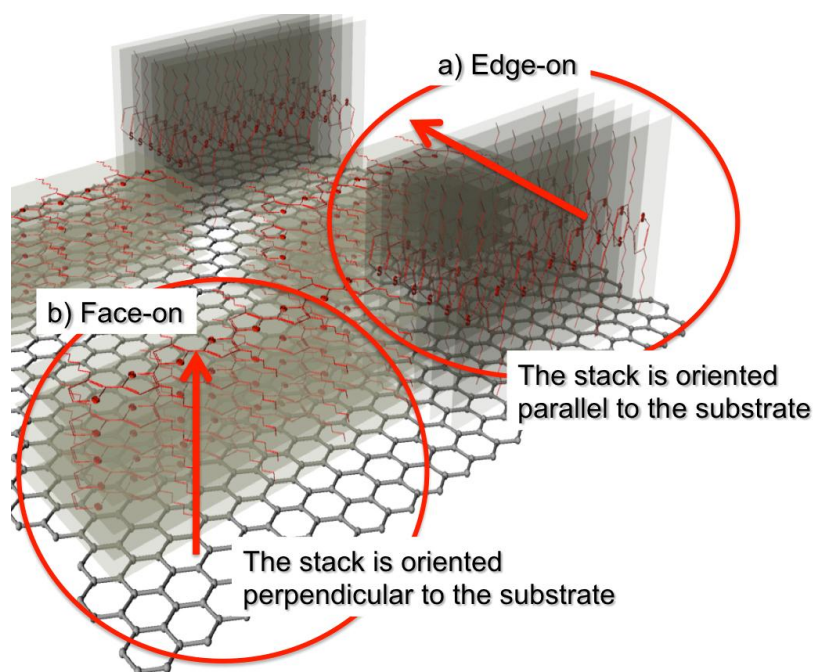

**Fig. S1.** Proposed schematic models of P3HT chains on graphene monolayer.

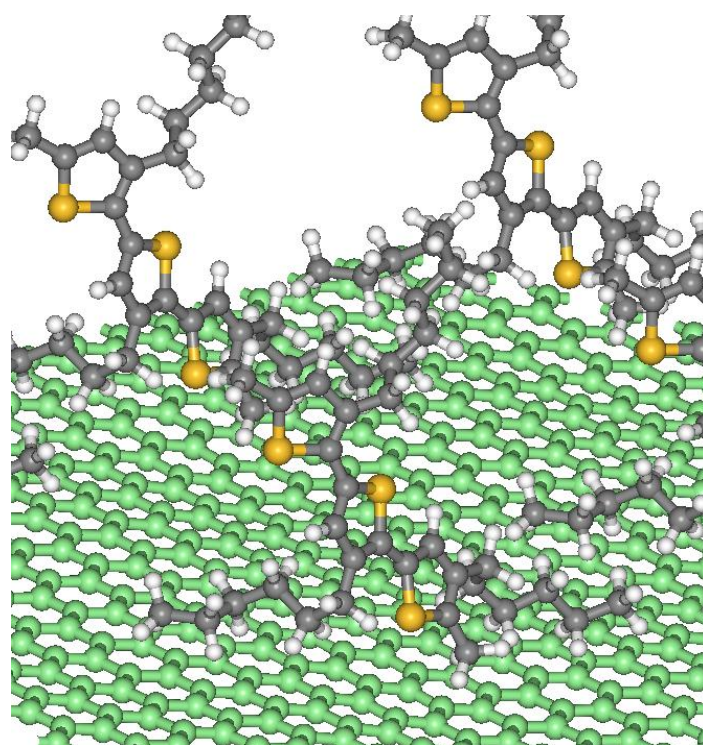

(a)

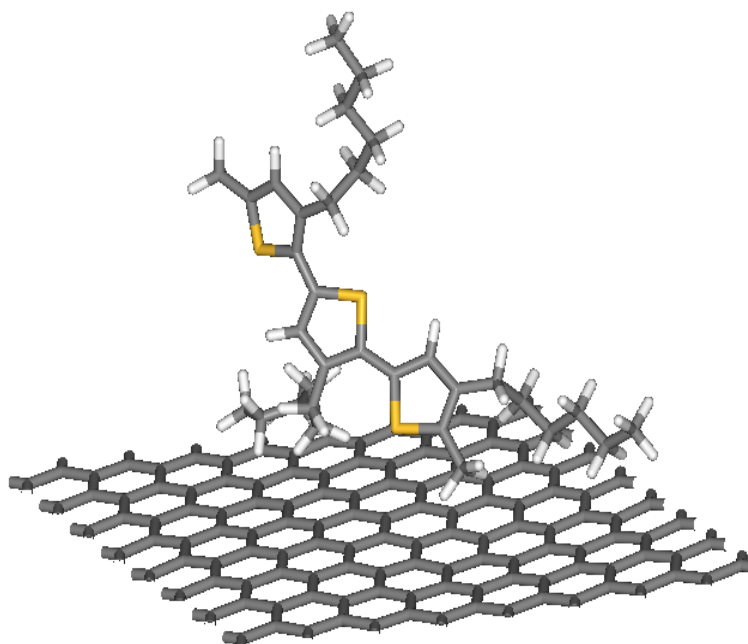

(b)

**Fig. S2.** (a) Side view of Figure 1b. (b) Model of a trimer with alkyl chain reflecting the real polymer system in which the long-axis of a trimer is further oriented parallel to the graphene substrate.

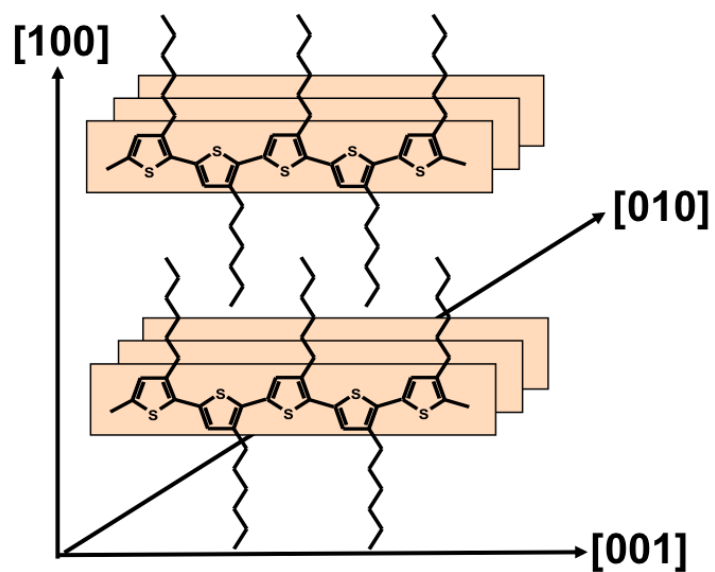

**Fig. S3.** Schematic diagram of P3HT crystallography.

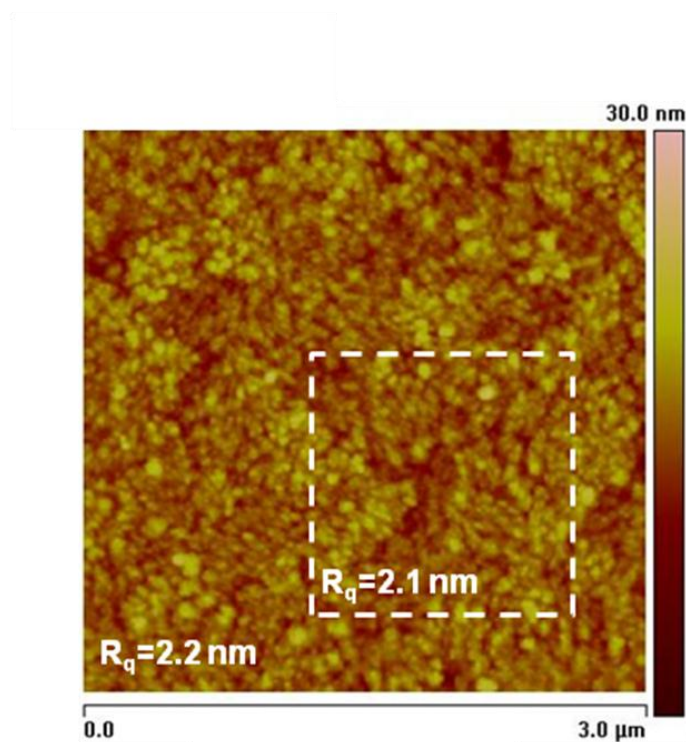

**Fig. S4.** AFM image and surface roughness of an ITO substrate.

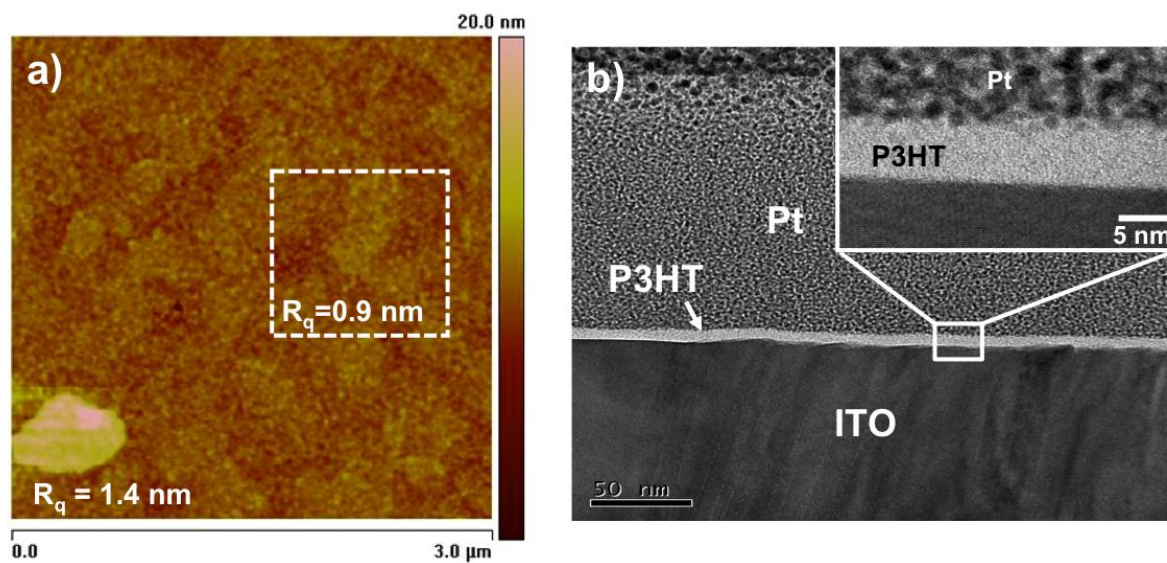

**Fig. S5.** Band Morphological features of a P3HT thin film spin-coated on ITO. a) AFM and b) cross-sectional TEM images.

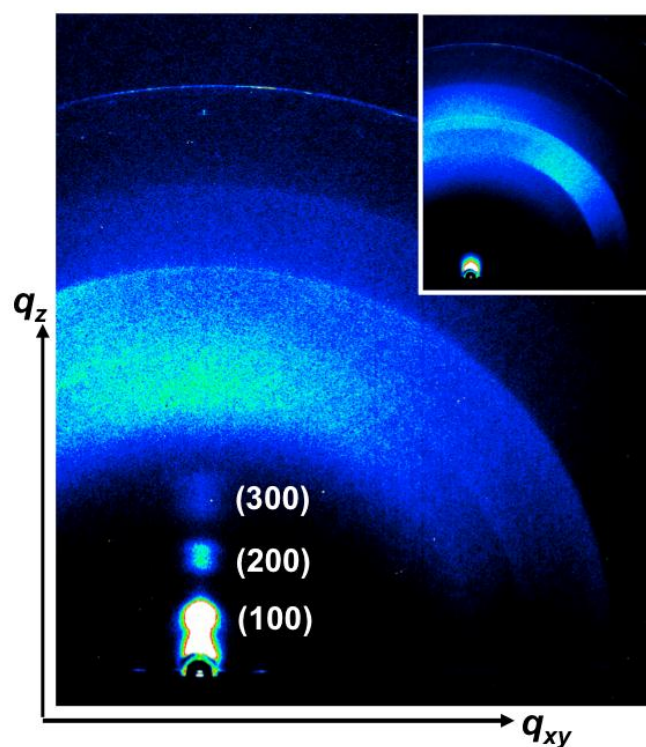

**Fig. S6.** 2D GIXD patterns of a P3HT film spin-coated on a ITO substrate. The inset shows GIXD pattern of ITO as a background.



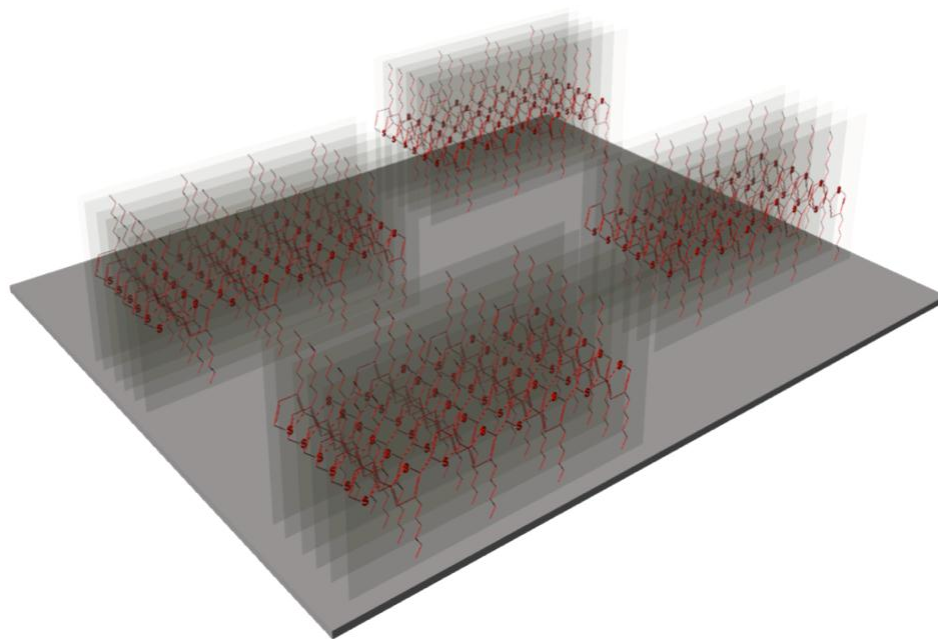

**Fig. S7.** Schematic illustration of arrangement of P3HT chains on an ITO surface.
